# Supplementary material for: Measurement Report: Quantitative Analysis of Aerosol Acidity and Its Driving Factors in Guanzhong Area, Northwest China
Source: Copernicus journal article supplement (doi:10.5194/egusphere-2026-609), 2026-02-16
Supplement: Supplementary file [file egusphere-2026-609-AC1-supplement.pdf]

**Table S1 Seasonal aerosol pH in response to changing NHR (training data).**

|           | Observed<br>NHR | Deviation<br>+20% NHR | Deviation<br>-20% NHR | Estimated<br>NHR | Remove p < 0.05<br>factors Estimated<br>NHR |
|-----------|-----------------|-----------------------|-----------------------|------------------|---------------------------------------------|
| pH-Winter | 4.87 ± 0.48     | 4.70 ± 0.49           | 5.03 ± 0.48           | 4.99 ± 0.49      | 4.95 ± 0.49                                 |
| pH-Spring | 4.26 ± 0.59     | 4.16 ± 0.60           | 4.39 ± 0.57           | 4.12 ± 0.61      | 4.09 ± 0.61                                 |
| pH-Summer | 3.93 ± 0.70     | 3.83 ± 0.71           | 4.03 ± 0.69           | 4.00 ± 0.73      | 4.05 ± 0.75                                 |
| pH-Autumn | 4.80 ± 0.64     | 4.69 ± 0.64           | 4.93 ± 0.63           | 4.55 ± 0.64      | 4.57 ± 0.64                                 |

\*The observed NHR denotes the measured ammonium conversion ratio. Deviation +20% NHR represents 1.2 times the observed NHR, and deviation -20% NHR represents 0.8 times the observed NHR. The estimated NHR was derived through multiple linear regression analysis, and the estimated NHR after removing factors with  $p < 0.05$  was obtained through multiple linear regression analysis.

**Table S2 Seasonal  $\Delta$ pH-total and the independent contribution of each factor.**

|          | $\Delta$ pH<br>-total | $\Delta$ pH<br>-T | $\Delta$ pH-<br>RH | $\Delta$ pH-<br>SO <sub>4</sub> <sup>2-</sup> | $\Delta$ pH-<br>NH <sub>x</sub> | $\Delta$ pH-<br>NO <sub>3</sub> <sup>-</sup> | $\Delta$ pH-<br>Cl <sup>-</sup> | $\Delta$ pH-<br>NVCs | $\Delta$ pH-<br>others |
|----------|-----------------------|-------------------|--------------------|-----------------------------------------------|---------------------------------|----------------------------------------------|---------------------------------|----------------------|------------------------|
| Win-Spr  | -1.17                 | -0.62             | 0.05               | 0.19                                          | -0.89                           | -0.01                                        | -0.06                           | 0.02                 | 0.14                   |
| Spr-Sumr | -0.98                 | -0.49             | 0.02               | 0.00                                          | 0.21                            | 0.05                                         | -0.02                           | -0.38                | -0.38                  |
| Sum-Aut  | 0.63                  | 0.65              | 0.34               | -0.21                                         | -0.22                           | 0.28                                         | 0.01                            | -0.06                | -0.16                  |
| Aut-Win  | 1.52                  | 0.54              | 0.04               | -0.21                                         | 0.70                            | -0.18                                        | 0.04                            | -0.06                | 0.64                   |

(The  $\Delta$ pH-others represents the residual change of pH not captured by these single-factor replacements)

**Table. S3 The numbers of PM<sub>2.5</sub>, PM<sub>10</sub> and O<sub>3</sub> pollution days in different seasons**

|                                            | Winter | Spring | Summer | Autumn |
|--------------------------------------------|--------|--------|--------|--------|
| PM <sub>2.5</sub> ( $\mu\text{g m}^{-3}$ ) | 67     | 17     | 2      | 10     |
| PM <sub>10</sub> ( $\mu\text{g m}^{-3}$ )  | 44     | 7      | 0      | 9      |
| O <sub>3</sub> ( $\mu\text{g m}^{-3}$ )    | 0      | 7      | 33     | 3      |

The daily averaged concentrations value exceeding national air quality standards of China

**Table S4 Results of T-test and F-test**

| Winter Model                  | T-test                       |         |       | F-test |          | Model Summary |                |                          |
|-------------------------------|------------------------------|---------|-------|--------|----------|---------------|----------------|--------------------------|
|                               | Non-standardized coefficient | T       | Sig.  | F      | Sig.     | R             | R <sup>2</sup> | Estimated standard error |
| Constant                      | 1.204                        | 3.029   | 0.003 |        |          |               |                |                          |
| SO <sub>4</sub> <sup>2-</sup> | -0.003                       | -5.531  | 0.000 |        |          |               |                |                          |
| NO <sub>3</sub> <sup>-</sup>  | 0.006                        | 15.476  | 0.000 |        |          |               |                |                          |
| K <sup>+</sup>                | 0.023                        | 4.297   | 0.000 | 295.93 | P < 0.01 | 0.88          | 0.77           | 0.082                    |
| Mg <sup>2+</sup>              | 0.328                        | 3.134   | 0.002 |        |          |               |                |                          |
| Ca <sup>2+</sup>              | -0.017                       | -1.578  | 0.115 |        |          |               |                |                          |
| T                             | -0.004                       | -2.581  | 0.010 |        |          |               |                |                          |
| RH                            | 0.001                        | 0.060   | 0.952 |        |          |               |                |                          |
|                               |                              |         |       |        |          |               |                |                          |
|                               |                              |         |       |        |          |               |                |                          |
|                               |                              |         |       |        |          |               |                |                          |
| Spring Model                  | T-test                       |         |       | F-test |          | Model Summary |                |                          |
| Constant                      | 0.533                        | 2.835   | 0.005 |        |          |               |                |                          |
| SO <sub>4</sub> <sup>2-</sup> | 0.006                        | 12.774  | 0.000 |        |          |               |                |                          |
| NO <sub>3</sub> <sup>-</sup>  | 0.005                        | 15.513  | 0.000 |        |          |               |                |                          |
| K <sup>+</sup>                | -0.018                       | -2.745  | 0.006 | 219.02 | P < 0.01 | 0.83          | 0.69           | 0.044                    |
| Mg <sup>2+</sup>              | -0.065                       | -0.898  | 0.370 |        |          |               |                |                          |
| Ca <sup>2+</sup>              | -0.017                       | -3.375  | 0.001 |        |          |               |                |                          |
| T                             | -0.001                       | -2.018  | 0.044 |        |          |               |                |                          |
| RH                            | -0.009                       | -0.581  | 0.562 |        |          |               |                |                          |
|                               |                              |         |       |        |          |               |                |                          |
|                               |                              |         |       |        |          |               |                |                          |
|                               |                              |         |       |        |          |               |                |                          |
| Summer Model                  | T-test                       |         |       | F-test |          | Model Summary |                |                          |
| Constant                      | -1.389                       | -9.369  | 0.000 |        |          |               |                |                          |
| SO <sub>4</sub> <sup>2-</sup> | 0.007                        | 18.481  | 0.000 |        |          |               |                |                          |
| NO <sub>3</sub> <sup>-</sup>  | 0.006                        | 14.972  | 0.000 |        |          |               |                |                          |
| K <sup>+</sup>                | 0.010                        | 0.864   | 0.388 | 339.18 | P < 0.01 | 0.82          | 0.67           | 0.045                    |
| Mg <sup>2+</sup>              | 0.021                        | 1.794   | 0.073 |        |          |               |                |                          |
| Ca <sup>2+</sup>              | -0.003                       | -1.281  | 0.200 |        |          |               |                |                          |
| T                             | 0.005                        | 9.903   | 0.000 |        |          |               |                |                          |
| RH                            | 0.066                        | 5.279   | 0.000 |        |          |               |                |                          |
|                               |                              |         |       |        |          |               |                |                          |
|                               |                              |         |       |        |          |               |                |                          |
|                               |                              |         |       |        |          |               |                |                          |
| Autumn Model                  | T-test                       |         |       | F-test |          | Model Summary |                |                          |
| Constant                      | 0.656                        | 4.944   | 0.000 |        |          |               |                |                          |
| SO <sub>4</sub> <sup>2-</sup> | 0.006                        | 16.318  | 0.000 |        |          |               |                |                          |
| NO <sub>3</sub> <sup>-</sup>  | 0.003                        | 15.854  | 0.000 |        |          |               |                |                          |
| K <sup>+</sup>                | -0.003                       | -0.637  | 0.524 | 537.31 | P < 0.01 | 0.86          | 0.74           | 0.057                    |
| Mg <sup>2+</sup>              | -0.064                       | -4.426  | 0.000 |        |          |               |                |                          |
| Ca <sup>2+</sup>              | -0.040                       | -12.934 | 0.000 |        |          |               |                |                          |
| T                             | -0.001                       | -3.197  | 0.001 |        |          |               |                |                          |
| RH                            | 0.012                        | 1.435   | 0.152 |        |          |               |                |                          |
|                               |                              |         |       |        |          |               |                |                          |
|                               |                              |         |       |        |          |               |                |                          |
|                               |                              |         |       |        |          |               |                |                          |

**Table S5 Pearson correlation among factors in each season**

| <b>Winter</b>                 | <b>NHR</b> | <b>SO<sub>4</sub><sup>2-</sup></b> | <b>NO<sub>3</sub><sup>-</sup></b> | <b>K<sup>+</sup></b> | <b>Mg<sup>2+</sup></b> | <b>Ca<sup>2+</sup></b> | <b>T</b> | <b>RH</b> |
|-------------------------------|------------|------------------------------------|-----------------------------------|----------------------|------------------------|------------------------|----------|-----------|
| NHR                           | 1          |                                    |                                   |                      |                        |                        |          |           |
| SO <sub>4</sub> <sup>2-</sup> | 0.803**    | 1                                  |                                   |                      |                        |                        |          |           |
| NO <sub>3</sub> <sup>-</sup>  | 0.862**    | 0.959**                            | 1                                 |                      |                        |                        |          |           |
| K <sup>+</sup>                | 0.754**    | 0.849**                            | 0.822**                           | 1                    |                        |                        |          |           |
| Mg <sup>2+</sup>              | 0.412**    | 0.316**                            | 0.361**                           | 0.477**              | 1                      |                        |          |           |
| Ca <sup>2+</sup>              | 0.229**    | 0.147**                            | 0.189**                           | 0.360**              | 0.689**                | 1                      |          |           |
| T                             | -0.142**   | -0.097*                            | -0.099*                           | -0.090*              | -0.047                 | 0.046                  | 1        |           |
| RH                            | 0.339**    | 0.390**                            | 0.367**                           | 0.479**              | 0.018                  | -0.024                 | -0.224** | 1         |
| <b>Spring</b>                 | <b>NHR</b> | <b>SO<sub>4</sub><sup>2-</sup></b> | <b>NO<sub>3</sub><sup>-</sup></b> | <b>K<sup>+</sup></b> | <b>Mg<sup>2+</sup></b> | <b>Ca<sup>2+</sup></b> | <b>T</b> | <b>RH</b> |
| NHR                           | 1          |                                    |                                   |                      |                        |                        |          |           |
| SO <sub>4</sub> <sup>2-</sup> | 0.701**    | 1                                  |                                   |                      |                        |                        |          |           |
| NO <sub>3</sub> <sup>-</sup>  | 0.743**    | 0.674**                            | 1                                 |                      |                        |                        |          |           |
| K <sup>+</sup>                | 0.261**    | 0.397**                            | 0.489**                           | 1                    |                        |                        |          |           |
| Mg <sup>2+</sup>              | -0.273**   | -0.032                             | -0.072                            | 0.376**              | 1                      |                        |          |           |
| Ca <sup>2+</sup>              | -0.327**   | -0.104**                           | -0.116**                          | 0.306**              | 0.898**                | 1                      |          |           |
| T                             | -0.041     | 0.129**                            | -0.051                            | -0.149**             | 0.076*                 | 0.051                  | 1        |           |
| RH                            | 0.151**    | 0.024                              | 0.101**                           | 0.117**              | -0.248**               | -0.242**               | -0.845** | 1         |
| <b>Summer</b>                 | <b>NHR</b> | <b>SO<sub>4</sub><sup>2-</sup></b> | <b>NO<sub>3</sub><sup>-</sup></b> | <b>K<sup>+</sup></b> | <b>Mg<sup>2+</sup></b> | <b>Ca<sup>2+</sup></b> | <b>T</b> | <b>RH</b> |
| NHR                           | 1          |                                    |                                   |                      |                        |                        |          |           |
| SO <sub>4</sub> <sup>2-</sup> | 0.751**    | 1                                  |                                   |                      |                        |                        |          |           |
| NO <sub>3</sub> <sup>-</sup>  | 0.677**    | 0.664**                            | 1                                 |                      |                        |                        |          |           |
| K <sup>+</sup>                | 0.385**    | 0.544**                            | 0.383**                           | 1                    |                        |                        |          |           |
| Mg <sup>2+</sup>              | 0.245**    | 0.125**                            | 0.174**                           | -0.053               | 1                      |                        |          |           |
| Ca <sup>2+</sup>              | -0.016     | 0.013                              | -0.093**                          | 0.473**              | 0.006                  | 1                      |          |           |
| T                             | 0.072*     | -0.037                             | -0.294**                          | -0.112**             | 0.215**                | 0.170**                | 1        |           |
| RH                            | 0.057      | 0.064*                             | 0.352**                           | 0.05                 | 0.044                  | -0.167**               | -0.840** | 1         |
| <b>Autumn</b>                 | <b>NHR</b> | <b>SO<sub>4</sub><sup>2-</sup></b> | <b>NO<sub>3</sub><sup>-</sup></b> | <b>K<sup>+</sup></b> | <b>Mg<sup>2+</sup></b> | <b>Ca<sup>2+</sup></b> | <b>T</b> | <b>RH</b> |
| NHR                           | 1          |                                    |                                   |                      |                        |                        |          |           |
| SO <sub>4</sub> <sup>2-</sup> | 0.786**    | 1                                  |                                   |                      |                        |                        |          |           |
| NO <sub>3</sub> <sup>-</sup>  | 0.779**    | 0.801**                            | 1                                 |                      |                        |                        |          |           |
| K <sup>+</sup>                | 0.274**    | 0.329**                            | 0.501**                           | 1                    |                        |                        |          |           |
| Mg <sup>2+</sup>              | -0.067*    | 0.084**                            | -0.159**                          | -0.399**             | 1                      |                        |          |           |
| Ca <sup>2+</sup>              | -0.236**   | -0.084**                           | 0.043                             | 0.556**              | -0.236**               | 1                      |          |           |
| T                             | 0.135**    | 0.290**                            | 0.071**                           | -0.485**             | 0.420**                | -0.300**               | 1        |           |
| RH                            | 0.229**    | 0.211**                            | 0.130**                           | -0.129**             | 0.300**                | -0.283**               | -0.103** | 1         |

\*\* . At the 0.01 level (two-tailed), the correlation is significant

\* . At the 0.05 level (two-tailed), the correlation is significant

**Table S6 Aerosol acidity in various parts of China**

| Sampling Site | Year        | Season    | pH        | Reference          |
|---------------|-------------|-----------|-----------|--------------------|
| Qinglin       | 2021 - 2022 | Winter    | 4.6 ± 1.2 | Liu et al. (2025)  |
| Xi'an         | 2017        | Winter    | 5.0 ± 0.6 | Wu et al. (2018)   |
|               |             | Summer    | 4.1 ± 1.2 |                    |
| Beijing       | 2016 - 2017 | Winter    | 4.5 ± 0.7 | Ding et al. (2019) |
|               |             | Spring    | 4.4 ± 1.2 |                    |
|               |             | Summer    | 3.8 ± 1.2 |                    |
|               |             | Autumn    | 4.3 ± 0.8 |                    |
|               | 2015 - 2016 | Winter    | 4.3 ± 0.3 | Liu et al. (2017)  |
|               | 2014        | Winter    | 4.1 ± 1.4 | Tan et al. (2018)  |
| Spring        |             | 2.1 ± 0.7 |           |                    |
| Summer        |             | 1.8 ± 0.5 |           |                    |
| Autumn        |             | 3.1 ± 1.2 |           |                    |
| Tianjin       | 2015        | Winter    | 4.9 ± 0.8 | Shi et al. (2019)  |
| Xiamen        | 2018        | Winter    | 3.5 ± 0.4 | Xu et al. (2025)   |
|               |             | Spring    | 3.0 ± 0.5 |                    |
|               |             | Summer    | 2.7 ± 0.5 |                    |
|               |             | Autumn    | 2.5 ± 0.5 |                    |
| Guangzhou     | 2012 - 2013 | All       | 2.5 ± 0.7 | Jia et al. (2020)  |
| Shanghai      | 2019 - 2020 | Winter    | 3.5 ± 0.4 | Fu et al. (2022)   |
|               |             | Spring    | 3.1 ± 0.5 |                    |
|               |             | Summer    | 2.6 ± 0.5 |                    |
|               |             | Autumn    | 2.7 ± 0.6 |                    |
| This Study    | 2022        | Winter    | 4.9 ± 0.4 |                    |
|               |             | Spring    | 3.4 ± 0.7 |                    |
|               |             | Summer    | 2.8 ± 0.7 |                    |
|               |             | Autumn    | 3.2 ± 0.7 |                    |

**Table S7 Average mass concentrations of NO<sub>3</sub>, SO<sub>4</sub><sup>2-</sup>, NH<sub>4</sub><sup>+</sup>, PM<sub>2.5</sub>, ALWC, H<sub>air</sub><sup>+</sup> and pH under clean and polluted conditions by season. The last column shows the pvalue from independent T-tests comparing pH between clean and polluted days for each season**

| <b>Winter</b> | <b>PM<sub>2.5</sub></b><br>(µg m <sup>-3</sup> ) | <b>SO<sub>4</sub><sup>2-</sup></b><br>(µg m <sup>-3</sup> ) | <b>NO<sub>3</sub><sup>-</sup></b><br>(µg m <sup>-3</sup> ) | <b>NH<sub>4</sub><sup>+</sup></b><br>(µg m <sup>-3</sup> ) | <b>RH</b><br>(%) | <b>T</b><br>(K) | <b>pH</b> | <b>ALWC</b><br>(µg m <sup>-3</sup> ) | <b>H<sub>air</sub><sup>+</sup></b><br>(µg m <sup>-3</sup> ) | <b>T-test</b> |
|---------------|--------------------------------------------------|-------------------------------------------------------------|------------------------------------------------------------|------------------------------------------------------------|------------------|-----------------|-----------|--------------------------------------|-------------------------------------------------------------|---------------|
| Average       | 93.5 ± 40.2                                      | 7.3 ± 4.7                                                   | 16.3 ± 11.9                                                | 7.3 ± 5.7                                                  | 65 ± 21          | 278.2 ± 4.2     | 4.8 ± 0.5 | 80.4 ± 112.9                         | 1.0E-06                                                     |               |
| Clean         | 56.4 ± 10.5                                      | 5.9 ± 2.8                                                   | 11.7 ± 4.9                                                 | 5.6 ± 2.4                                                  | 75 ± 16          | 278.2 ± 3.8     | 4.8 ± 0.4 | 63.3 ± 78.1                          | 5.2E-07                                                     | p < 0.01      |
| Polluted      | 114.9 ± 34.7                                     | 9.4 ± 5.4                                                   | 23.8 ± 12.4                                                | 10.6 ± 6.1                                                 | 71 ± 18          | 277.3 ± 4.1     | 5.0 ± 0.3 | 94.3 ± 130.6                         | 1.0E-06                                                     |               |
| <b>Spring</b> | <b>PM<sub>2.5</sub></b>                          | <b>SO<sub>4</sub><sup>2-</sup></b>                          | <b>NO<sub>3</sub><sup>-</sup></b>                          | <b>NH<sub>4</sub><sup>+</sup></b>                          | <b>RH</b>        | <b>T</b>        | <b>pH</b> | <b>ALWC</b>                          | <b>H<sub>air</sub><sup>+</sup></b>                          | <b>T-test</b> |
| Average       | 61.4 ± 40.8                                      | 4.3 ± 1.7                                                   | 6.4 ± 7.1                                                  | 2.5 ± 2.6                                                  | 62 ± 18          | 291.2 ± 5.8     | 3.6 ± 0.5 | 55.7 ± 132.2                         | 6.4E-06                                                     |               |
| Clean         | 42.2 ± 14.0                                      | 4.4 ± 1.6                                                   | 6.8 ± 7.4                                                  | 3.0 ± 2.7                                                  | 70 ± 18          | 291.0 ± 5.8     | 3.3 ± 0.7 | 58.9 ± 140.5                         | 6.8E-06                                                     | p < 0.01      |
| Polluted      | 111.9 ± 35.1                                     | 7.0 ± 1.7                                                   | 16.8 ± 8.1                                                 | 6.0 ± 3.1                                                  | 67 ± 21          | 288.1 ± 5.5     | 4.0 ± 0.3 | 32.5 ± 34.0                          | 3.1E-06                                                     |               |
| <b>Summer</b> | <b>PM<sub>2.5</sub></b>                          | <b>SO<sub>4</sub><sup>2-</sup></b>                          | <b>NO<sub>3</sub><sup>-</sup></b>                          | <b>NH<sub>4</sub><sup>+</sup></b>                          | <b>RH</b>        | <b>T</b>        | <b>pH</b> | <b>ALWC</b>                          | <b>H<sub>air</sub><sup>+</sup></b>                          | <b>T-test</b> |
| Average       | 33.3 ± 13.7                                      | 3.5 ± 2.2                                                   | 1.0 ± 1.2                                                  | 1.1 ± 0.9                                                  | 61 ± 16          | 302.0 ± 4.1     | 2.7 ± 0.7 | 10.0 ± 25.1                          | 9.9E-06                                                     |               |
| Clean         | 30.7 ± 8.3                                       | 4.2 ± 2.2                                                   | 1.2 ± 1.4                                                  | 1.5 ± 0.9                                                  | 66 ± 16          | 302.2 ± 4.1     | 2.8 ± 0.7 | 10.2 ± 25.4                          | 1.0E-05                                                     | p > 0.01      |
| Polluted      | 92.2                                             | 4.0                                                         | 1.1                                                        | 1.3                                                        | 57               | 302.2           | 2.7       | 3.8                                  | 8.9E-06                                                     |               |
| <b>Autumn</b> | <b>PM<sub>2.5</sub></b>                          | <b>SO<sub>4</sub><sup>2-</sup></b>                          | <b>NO<sub>3</sub><sup>-</sup></b>                          | <b>NH<sub>4</sub><sup>+</sup></b>                          | <b>RH</b>        | <b>T</b>        | <b>pH</b> | <b>ALWC</b>                          | <b>H<sub>air</sub><sup>+</sup></b>                          | <b>T-test</b> |
| Average       | 43.1 ± 25.1                                      | 4.4 ± 3.1                                                   | 8.7 ± 10.8                                                 | 3.8 ± 4.1                                                  | 80 ± 13          | 290.3 ± 5.1     | 3.3 ± 0.7 | 76.2 ± 121.0                         | 1.8E-05                                                     |               |
| Clean         | 36.8 ± 15.3                                      | 4.4 ± 2.9                                                   | 6.1 ± 6.3                                                  | 3.1 ± 2.5                                                  | 82 ± 13          | 290.6 ± 5.2     | 3.1 ± 0.7 | 61.9 ± 111.5                         | 1.8E-05                                                     | p < 0.01      |
| Polluted      | 90.9 ± 8.6                                       | 7.7 ± 1.0                                                   | 29.7 ± 3.1                                                 | 14 ± 1.3                                                   | 86 ± 9           | 286.5 ± 1.3     | 3.9 ± 0.1 | 171.6 ± 149.5                        | 1.7E-05                                                     |               |

\*Only two polluted days in summer; so no SD calculated.

**Table S8 Sensitivity of PM<sub>2.5</sub> pH to SO<sub>4</sub><sup>2-</sup>, NH<sub>x</sub>, NO<sub>3</sub><sup>-</sup>, Cl<sup>-</sup>, Ca<sup>2+</sup>, RH and T. The greater the relative standard deviation (RSD), the greater the impact of the variable change.**

| Impact factor  | SO <sub>4</sub> <sup>2-</sup> | NH <sub>x</sub> | NO <sub>3</sub> <sup>-</sup> | Cl <sup>-</sup> | RH    | T    | Ca <sup>2+</sup> |
|----------------|-------------------------------|-----------------|------------------------------|-----------------|-------|------|------------------|
| Winter RSD (%) | 5.83                          | 4.66            | 0.85                         | 0.96            | 4.48  | 4.38 | 3.25             |
| Spring RSD (%) | 5.58                          | 28.34           | 4.11                         | 0.23            | 10.85 | 9.22 | 8.75             |
| Summer RSD (%) | 21.79                         | 9.06            | 1.76                         | 0.06            | 12.11 | 7.13 | 6.16             |
| Autumn RSD (%) | 6.09                          | 39.77           | 9.39                         | 0.50            | 4.39  | 6.19 | 1.41             |

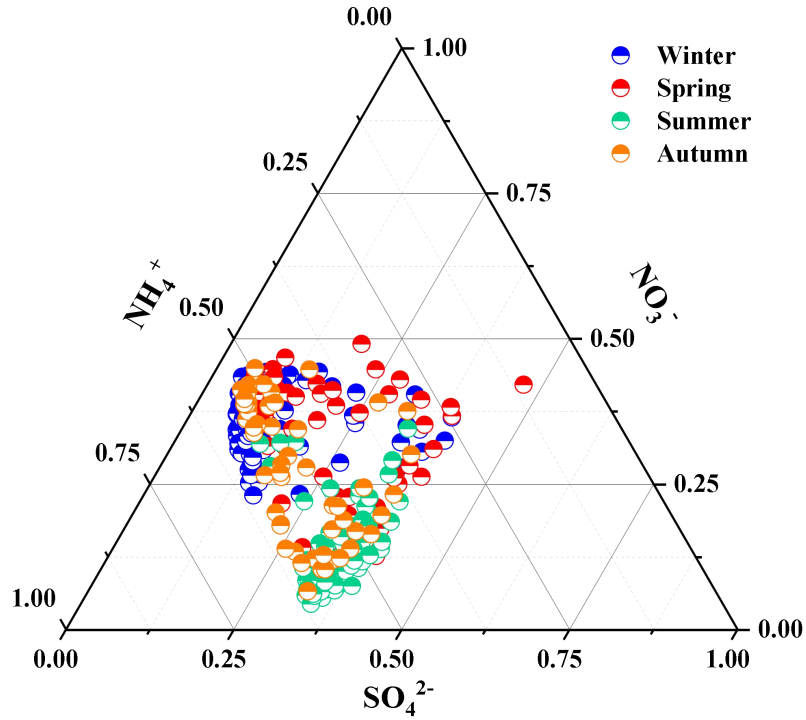

Fig. S1 Ternary diagram of molar concentration ratio of  $\text{SO}_4^{2-}$ ,  $\text{NO}_3^-$  and  $\text{NH}_4^+$  in each season

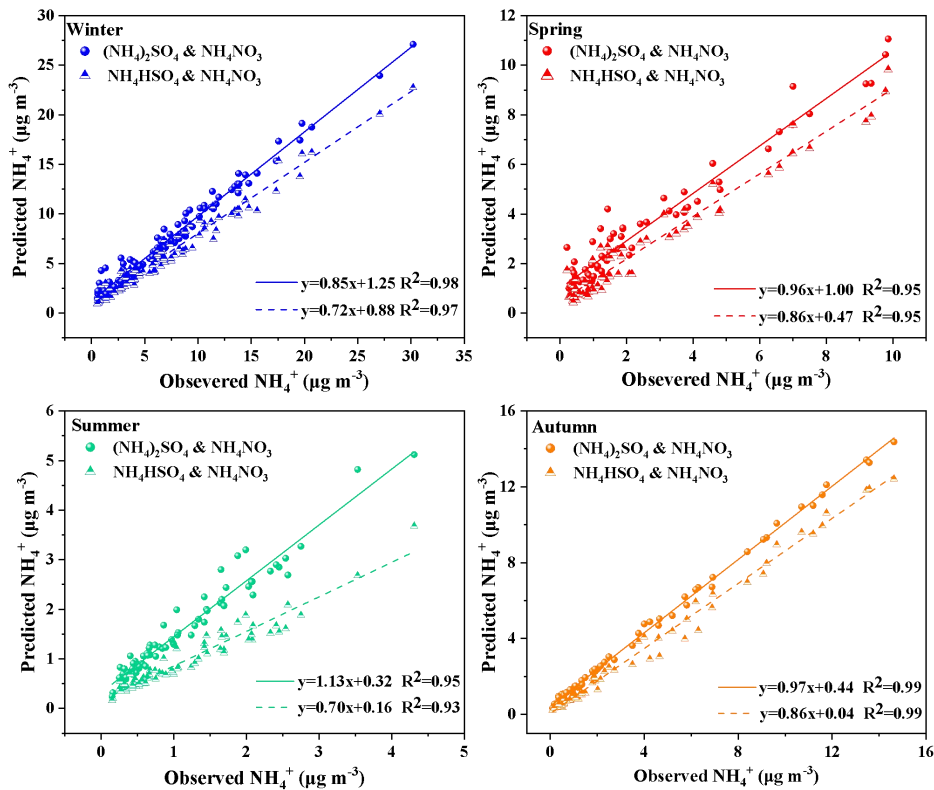

Fig. S2 Linear relationship between observed and predicted values of  $\text{NH}_4^+$

(When  $\text{NH}_4^+$ ,  $\text{SO}_4^{2-}$ , and  $\text{NO}_3^-$  exist in the atmosphere as  $(\text{NH}_4)_2\text{SO}_4$  and  $\text{NH}_4\text{NO}_3$ , the predicted  $\text{NH}_4^+$  concentration is calculated as:  $[\text{NH}_4^+] = [\text{NO}_3^-] \times 18/62 + [\text{SO}_4^{2-}] \times 36/96$ ; When exist as  $\text{NH}_4\text{HSO}_4$  and  $\text{NH}_4\text{NO}_3$ , it is calculated as:  $[\text{NH}_4^+] = [\text{NO}_3^-] \times 18/62 + [\text{SO}_4^{2-}] \times 18/96$ ,  $\mu\text{g m}^{-3}$ )

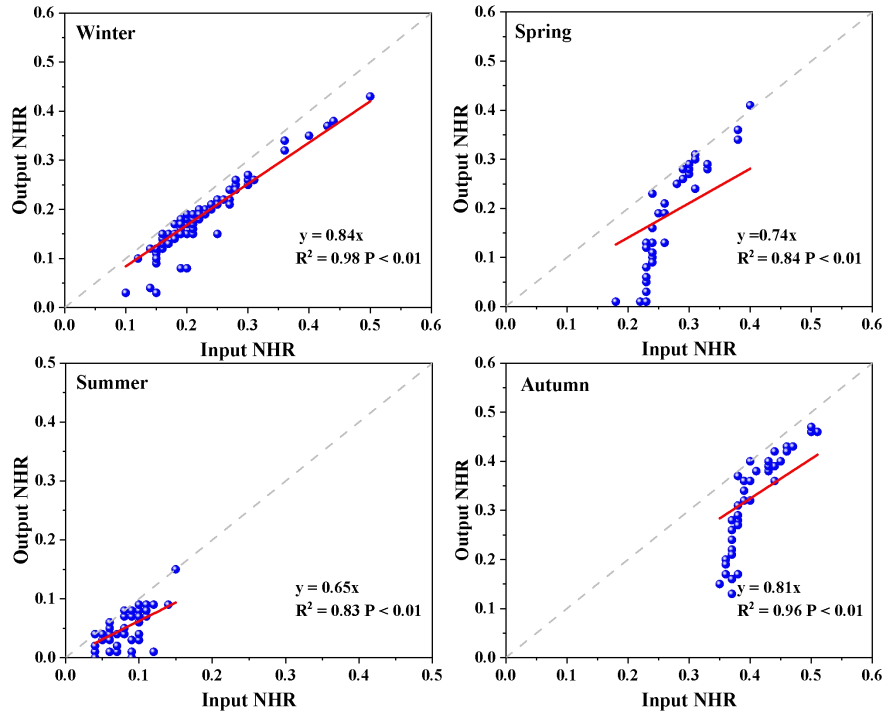

Fig. S3 Correlation between daily mean input and output NHR from the ISORROPIA-II

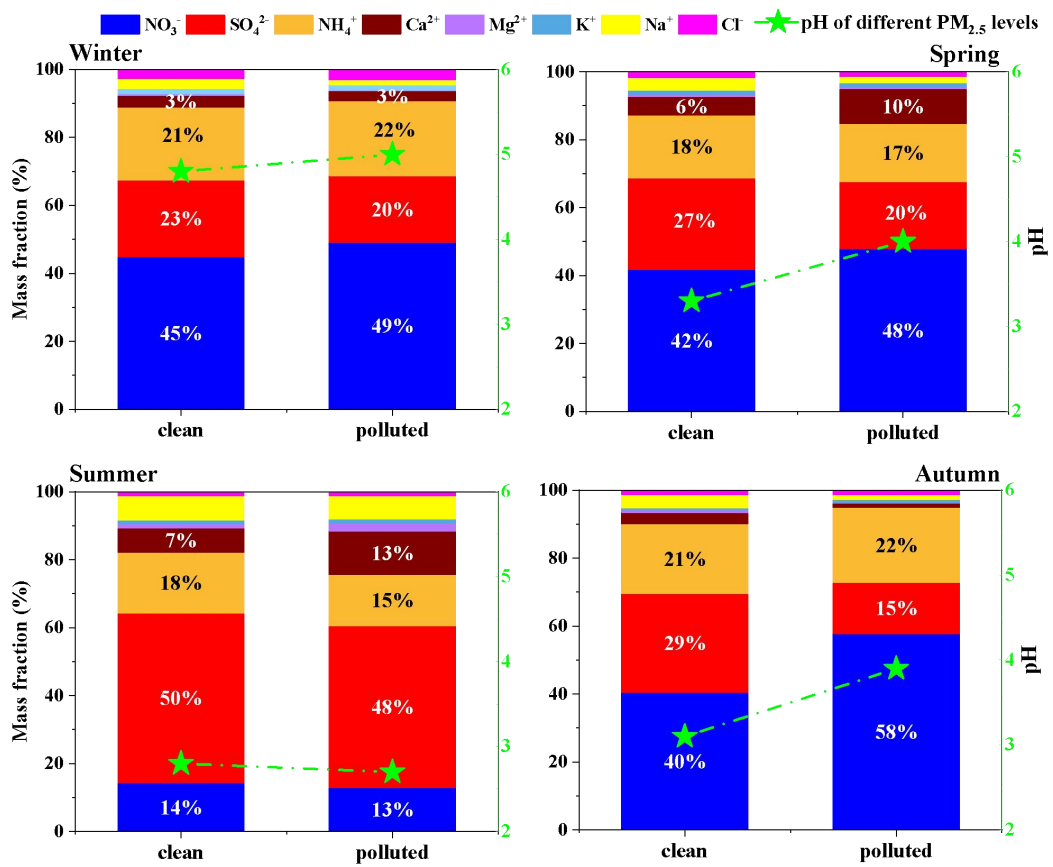

Fig. S4 Percentage change in aerosol pH and major WSIs across different  $PM_{2.5}$  concentration bins. The asterisk represents the pH

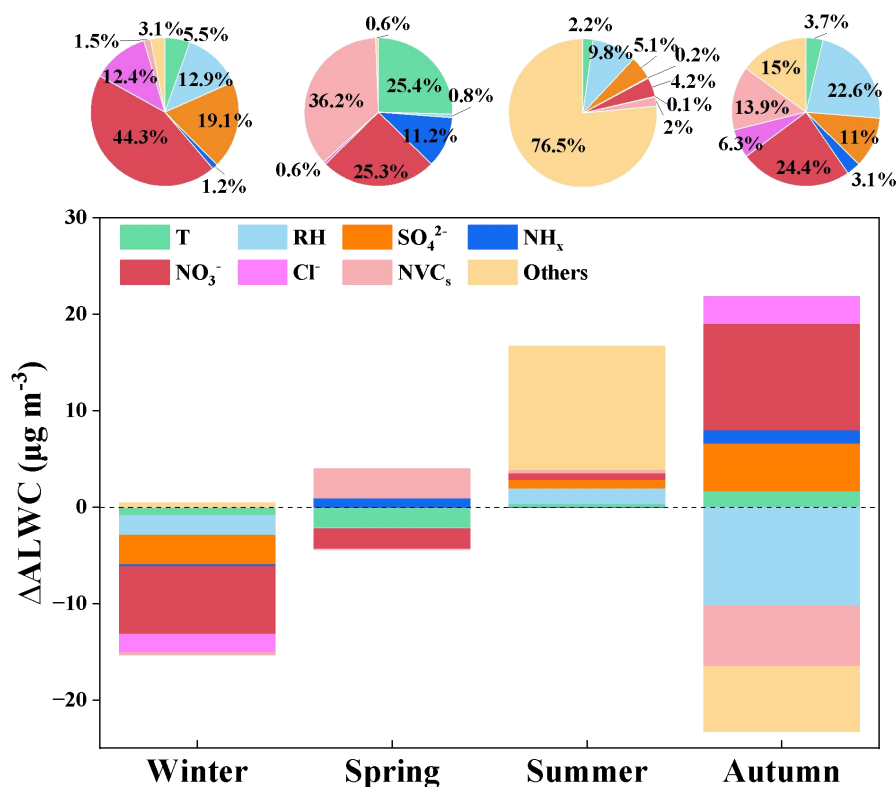

**Fig. S5** The contribution of various influencing factors to the seasonal ALWC. The pie chart shows the relative contributions of various influencing factors to the seasonal ALWC (absolute values of ALWC was taken for pie chart).

### Reference:

Ding, J., Zhao, P., Su, J., Dong, Q., Du, X., and Zhang, Y.: Aerosol pH and its driving factors in Beijing, *Atmos. Chem. Phys.*, 19(12), 7939–7954, <https://doi.org/10.5194/acp-19-7939-2019>, 2019.

Fu, Z., Cheng, L., Ye, X., Ma, Z., Wang, R., Duan, Y., Tao, J., and Cheng, J.: Characteristics of aerosol chemistry and acidity in shanghai after PM<sub>2.5</sub> satisfied national guideline: Insight into future emission control. *Sci. Total Environ.*, 827, 154319, <http://dx.doi.org/10.1016/j.scitotenv.2022.154319>, 2022.

Jia, S., Chen, W., Zhang, Q., Krishnan, P., Mao, J., Zhong, B., Huang, M., Fan, Q., Zhang, J., Chang, M., Yang, L., and Wang, X.: A quantitative analysis of the driving factors affecting seasonal variation of aerosol pH in Guangzhou, China. *Sci. Total Environ.*, 725, 138228, <https://doi.org/10.1016/j.scitotenv.2020.138228>, 2020.

Liu, M., Song, Y., Zhou, T., Xu, Z., Yan, C., Zheng, M., Wu, Z., Hu, M., Wu, Y., and Zhu, T.: Fine particle pH during severe haze episodes in northern China. *Geophys. Res. Lett.*, 44(10), 5213–5221, <https://doi.org/10.1002/2017GL073210>, 2017.

Liu, Y., Guo, X., Zhang, Y., Cao, Y., Jiang, Y., Qi, W., Shen, M., Li, L., Wang, Q., Dai, W., and Li, J.: Chemical characteristics of wintertime PM<sub>2.5</sub> in background region of northwest China during urban emission reduction. *Iscience*, 28(10), 113528, <https://doi.org/10.1016/j.isci.2025.113528>, 2025.

Tan, T., Hu, M., Li, M., Guo, Q., Wu, Y., Fang, X., Gu, F., Wang, Y., and Wu, Z.: New insight into PM<sub>2.5</sub> pollution patterns in Beijing based on one-year measurement of chemical compositions. *Sci. Total Environ.*, 621, 734–743, <https://doi.org/10.1016/j.scitotenv.2017.11.208>, 2018.

Shi, G., Xu, J., Shi, X., Liu, B., Bi, X., Xiao, Z., Chen, K., Wen, J., Dong, S., Tian, Y., Feng, Y., Yu, H., Song, S., Zhao, Q., Gao, J., and Russell, A. G.: Aerosol pH dynamics during haze periods in an urban environment in China: use of detailed, hourly, speciated observations to study the role of ammonia availability and secondary aerosol formation and urban environment. *J. Geophys. Res.: Atmos.*, 124(16), 9730–9742, <https://doi.org/10.1029/2018JD029976>, 2019.

Wu, C.: Seasonal variation of atmospheric acid and alkali substances and gas-solid phase distribution characteristics in typical cities of Guanzhong. University of Chinese Academy of Sciences, Beijing, China, 2018.

Xu, K., Yin, L., Chen, Q., Liao, D., Ji, X., Zhang, K., Wu, Y., Xu, L., Li, M., Fan, X., Zhang, F., Huang, Z., Chen, J., and Hong, Y.: Quantitative analysis of influencing factors to aerosol pH and its responses to PM<sub>2.5</sub> and O<sub>3</sub> pollution in a coastal city. *J. Environ. Sci.*, 151, 284–297, <https://doi.org/10.1016/j.jes.2024.03.044>, 2025.
